# Supplementary material
Source: PubMed Central journal article supplement (PMC8905301)
Supplement: mmc1.pdf [file mmc1.pdf]

# THE LANCET

## Supplementary appendix

This appendix formed part of the original submission and has been peer reviewed. We post it as supplied by the authors.

Supplement to: Feikin DR, Higdon MM, Abu-Raddad LJ, et al. Duration of effectiveness of vaccines against SARS-CoV-2 infection and COVID-19 disease: results of a systematic review and meta-regression. *Lancet* 2022; published online Feb 21. [https://doi.org/10.1016/S0140-6736\(22\)00152-0](https://doi.org/10.1016/S0140-6736(22)00152-0).

1 **Duration of effectiveness of vaccines against SARS-CoV-2 infection and COVID-19 disease:**  
2 **Results of a systematic review and meta-regression**

3

4 Daniel R. Feikin\*, Melissa M. Higdon\*, Laith J. Abu-Raddad, Nick Andrews, Rafael Araos, Yair  
5 Goldberg, Michelle J. Groome, Amit Huppert, Katherine L. O'Brien, Peter G. Smith, Annelies  
6 Wilder-Smith, Scott Zeger, Maria Deloria Knoll\*, Minal K. Patel\*

7

8

9 Affiliations:

10 Department of Immunizations, Vaccines and Biologicals, World Health Organization, Geneva,  
11 Switzerland (D. Feikin, MD, K. O'Brien, MD, A. Wilder-Smith, MD, M. Patel, MD); International  
12 Vaccine Access Center, Johns Hopkins Bloomberg School of Public Health, Baltimore, Maryland,  
13 U.S.A. (M. Higdon, MPH, M. Deloria Knoll, PhD); Infectious Disease Epidemiology Group, Weill  
14 Cornell Medicine–Qatar Doha, Qatar (L.J. Abu-Raddad, PhD); UK Health Security Agency, London,  
15 UK (N Andrews PhD); Instituto de Ciencias e Innovacion en Medicina, Facultad de Medicina,  
16 Clinica Alemana Universidad del Desarrollo, and the Advanced Center for Chronic Diseases,  
17 Santiago, Chile (R. Araos, MD); Technion - Israel Institute of Technology, Haife, Israel (Y. Goldberg,  
18 PhD); The Gertner Institute for Epidemiology & Health Policy Research, Sheba Medical Center,  
19 and Tel Aviv University, Tel Aviv, Israel (A. Huppert, PhD); National Institute for Communicable  
20 Diseases, Division of the National Health Laboratory Service, Johannesburg, South Africa and  
21 School of Pathology, Faculty of Health Sciences, University of the Witwatersrand, Johannesburg, South  
22 Africa (M. Groome, PhD); MRC International Statistics and Epidemiology Group MRC International  
23 Statistics and Epidemiology Group, London School of Hygiene and Tropical Medicine, United  
24 Kingdom of Great Britain and Northern Ireland (Prof P. G. Smith, DSc). Department of  
25 Epidemiology, Johns Hopkins, Bloomberg School of Public Health, Baltimore, Maryland, U.S.A.  
26 (Prof S. Zeger, PhD)

27

28 \*contributed equally.

29  
30  
31  
32  
33  
34  
35  
36  
37  
38  
39  
40  
41  
42  
43  
44  
45  
46  
47  
48  
49  
50

**Summary**

Background. Knowing if COVID-19 vaccine effectiveness wanes is critical to informing vaccine policy, such as the need for and timing of booster doses.

Methods. We performed a systematic review of pre-print and published article databases from June 17 to December 2, 2021. Studies with vaccine efficacy or effectiveness (VE) estimates at discrete time intervals after full vaccination and meeting pre-defined screening criteria underwent full-text review. We used random effects meta-regression to estimate the average change in VE from one-to-six months after full vaccination.

Findings. Of 13,744 studies screened, 310 underwent full text review, and 18 were included (all pre-Omicron). Risk of bias determination by ROB2 and ROBINS-I tools was low (n=3), moderate (n=8) and serious (n=7). Seventy-eight vaccine-specific VE evaluations were included (Pfizer/BioNTech-Comirnaty (n=38), Moderna-mRNA-1273 (n=23), Janssen-Ad26.COVID.S (n=9), and AstraZeneca-Vaxzevria (n=8). On average, VE against SARS-CoV-2 infection decreased from one-to-six months after full vaccination by 21.0 (95% CI 13.9-29.8) percentage points among persons of all ages and 20.7 (95% CI 10.2-36.6) percentage points among older persons (as defined by each study, at least  $\geq$ 50 years old); for symptomatic COVID-19 disease, VE decreased by 24.9 (95% CI 13.4-41.6) and 32.0 (95% CI 11.0-69.0) percentage points, respectively; for severe COVID-19 disease, VE decreased by 10.0 (95% CI 6.1-15.4) and 9.5 (95% CI 5.7-14.6) percentage points, respectively. Most (81%) VE estimates against severe disease remained greater than 70% over time.

51 Interpretation. COVID-19 VE against severe disease remained high, although it did decrease some  
52 (9.5-10.0 percentage points) by six months after full vaccination. In contrast, VE against infection  
53 and symptomatic disease decreased approximately 20-30 percentage points by six months. The  
54 decrease in VE is likely due, at least in part, to waning immunity, although an effect of bias cannot  
55 be ruled out. Evaluating VE beyond six months will be critical for updating COVID-19 vaccine  
56 policy.

57 Funding. Coalition for Epidemic Preparedness Innovations

58

59

## 60 **Research in Context**

### 61 *Evidence before this study*

62 Approximately one year after the first introductions of COVID-19 vaccines, multiple studies have  
63 been published that assess vaccine efficacy and effectiveness (VE) after full vaccination. Several  
64 systematic reviews of COVID-19 vaccine efficacy/effectiveness studies have been published, but  
65 none focused on how VE changes with time since vaccination. We systematically reviewed the  
66 evidence for changes in COVID-19 VE with time since full vaccination for various clinical  
67 outcomes. Additionally, our review summarizes evidence for rates of breakthrough infections  
68 due to the Delta variant among vaccinated persons stratified by time since vaccination. In  
69 interpreting these studies, we discuss potential biases in evaluating changes in vaccine  
70 effectiveness with time since vaccination.

71 We searched for studies that evaluated VE at discrete time intervals after full vaccination from  
72 June 17 to December 2, 2021 in PubMed, Embase, medRxiv, bioRxiv, khub, Research Square,  
73 SSRN, Eurosurveillance.org, Europepmc.org and the World Health Organization COVID-19  
74 Database (which compiles searches of over 100 databases, including Scopus, Web of Science and  
75 the grey literature). We searched for studies with multiple variations of the primary key search  
76 terms, of “COVID-19” and “SARS-CoV-2” and “vaccine” (including names of specific vaccines) and  
77 “randomized controlled trial” or “vaccine effectiveness” (including names of specific study  
78 designs). We also hand-searched regulatory agency databases. Studies were included if they  
79 presented VE estimates at discrete time intervals from full vaccination compared to unvaccinated  
80 persons for SARS-CoV-2 infection, COVID-19 symptomatic disease, or severe disease – for any

81 vaccine that has received Emergency Use Listing at WHO. VE estimates confined to a single  
82 variant and due to a mixture of variants were analyzed separately. Random effects meta-  
83 regression was used to estimate the average change in VE from one to six months after full  
84 vaccination. After applying exclusion criteria, we included 18 studies of VE at discrete time  
85 intervals after full vaccination and seven studies in which risk of breakthrough infection could be  
86 assessed by time of vaccination. In addition, the same search strategy was used to find studies  
87 presenting analyses of breakthrough infections, in which the rate, risk or odds of COVID-19  
88 outcomes among different vaccine cohorts (i.e., vaccinated at different times) were included.

#### 89 *Added value of this study*

90 We found during the six months after full vaccination the VE against SARS-CoV-2 infection and  
91 symptomatic COVID-19 disease decreased by approximately 20-30 percentage points, on  
92 average, for the four vaccines evaluated. In contrast, most studies showed that VE against severe  
93 disease was maintained above 70% after full vaccination, with minimal decrease through six  
94 months (approximately 9-10 percentage points). This is the first systematic review and meta-  
95 regression to date, to our knowledge, that describes the timing and magnitude of decreasing VE  
96 over time since full vaccination by disease outcome.

#### 97 *Implications of all the available evidence*

98 Studies of the duration of protection of COVID-19 vaccine effectiveness as a whole indicate that  
99 vaccine effectiveness decreases more against infection and symptomatic disease than against  
100 severe disease in the six months after full vaccination. This decreasing VE is likely due, at least in  
101 part, to waning immunity. Multiple biases, however, can affect estimates of declining VE over

102 time. Whether VE will eventually decrease further against severe disease, and in the setting of  
103 new variants like Omicron, requires ongoing evaluation at later time points after full vaccination.  
104 Policy makers considering the need and timing of booster doses should integrate vaccine- and  
105 outcome-specific evidence of decreasing VE with other considerations, such as vaccine coverage  
106 and supply, prioritization relative to primary series vaccination, programmatic issues, and local  
107 COVID-19 epidemiology.

108

109

## 110 **Introduction**

111 Almost two years into the COVID-19 pandemic, multiple COVID-19 vaccines have received  
112 Emergency Use Listing/Authorization (EUL/EUA) by regulatory authorities and the World Health  
113 Organization (WHO) based on vaccine efficacy results from randomized controlled trials.<sup>1</sup> Efficacy  
114 results at the time of EUL/EUA, however, had a median follow-up time after full vaccination of  
115 only two-to-three months. Estimates of vaccine effectiveness among persons vaccinated as part  
116 of national vaccine roll-outs were similar to the efficacy results in the first few months after  
117 vaccine introduction.<sup>2</sup> Assessing the duration of protection for COVID-19 vaccines over longer  
118 time periods, however, requires continued monitoring. Knowing if and to what extent vaccine  
119 effectiveness wanes is critical to inform vaccine policy decisions, such as the need for, timing, and  
120 target populations for booster doses.

121 Several systematic reviews of COVID-19 efficacy/effectiveness studies have been published, but  
122 none evaluated the duration of protection of COVID-19 vaccines.<sup>3-8</sup> We systematically reviewed  
123 the evidence for the duration of protection of COVID-19 vaccines against various clinical  
124 outcomes by assessing studies that evaluate vaccine efficacy or effectiveness (henceforth  
125 referred to as VE) at various time periods after vaccination. Additionally, we evaluated rates of  
126 breakthrough infection due to Delta variant among vaccinated persons stratified by time since  
127 vaccination.

128

## 129 **Methods**

130 *Search strategy and selection criteria*



131 Since June 2021, the World Health Organization and International Vaccine Access Center at  
132 Johns Hopkins Bloomberg School of Public Health have been tracking the emerging evidence for  
133 COVID-19 VE and have posted their methodology and updated weekly results at the VIEW-HUB  
134 website<sup>9</sup>. For this systematic review, we followed PRISMA guidelines (Supplement S1). We  
135 considered peer-reviewed and pre-print studies published from June 17 to December 2, 2021.  
136 Randomized controlled trials of COVID-19 vaccine efficacy and observational studies of COVID-  
137 19 vaccine effectiveness were eligible. The following databases and pre-print servers were  
138 searched without restrictions by language of publication: PubMed, Embase, medRxiv, BioRxiv,  
139 khub, Research Square, SSRN, Eurosurveillance.org, Europepmc.org and the World Health  
140 Organization COVID-19 Database, which compiles searches of over 100 databases, including  
141 Scopus, Web of Science and the grey literature. The search strategy is described in Supplement  
142 S2. During full-text review, a VE study was excluded if it did not meet pre-defined criteria  
143 (Supplement S3). Only VE estimates that compared fully vaccinated with unvaccinated persons  
144 were included; we excluded estimates that included partially vaccinated persons. In addition,  
145 U.S. Food and Drug Administration and European Medicines Agency websites were hand-  
146 searched for manufacturers' applications for approval of additional or booster doses.  
147 Discrepancies on study inclusion were resolved by discussion among three investigators (MH,  
148 MDK, MKP).

149 Most COVID-19 VE studies have given results as cumulative VE after full vaccination through  
150 variable time periods of follow-up. However, cumulative VE estimates over several months can  
151 distort estimates of waning immunity, particularly if most cases occur in the earlier or later parts  
152 of the follow-up period. Therefore, we applied a second set of inclusion/exclusion criteria after

153 the initial search, undertaken by two investigators (MKP, MH). First, studies were included if they  
154 presented multiple VE estimates for discrete time intervals after the final dose in the primary  
155 series. Second, to allow sufficient time for potential waning to occur, studies were excluded if  
156 they did not provide at least one VE estimate 3 months after the final dose (Supplement S4).  
157 Third, we excluded studies that combined multiple vaccines in VE estimates because vaccines of  
158 differing effectiveness were often introduced at different times to varying target populations,  
159 which could lead to confounding of VE estimates at different time intervals.

160 An approach to disaggregate a decreasing VE due to waning immunity from that due to a newly  
161 prevalent variant over time is to compare rates of vaccine breakthrough infections by time since  
162 vaccination during a time period when a single variant is predominant. For this approach, we  
163 considered studies of breakthrough infection (i.e., infection or disease among fully vaccinated  
164 persons only) identified through the full-text review. One study was eligible for both analyses.<sup>10</sup>  
165 We included studies that provided risk ratios, rate ratios, or odds ratios of breakthrough infection  
166 (or provided data to calculate them) among different vaccine-recipient cohorts (i.e., people  
167 vaccinated at different times). We only included studies that identified cases during periods when  
168 Delta was the pre-dominant variant.

169 All studies meeting inclusion criteria for both analyses were evaluated for bias using the risk of  
170 bias 2 tool for randomized controlled trials (ROB2) or the risk of bias in non-randomized studies  
171 of interventions tool (ROBINS-I).<sup>11,12</sup>

172 *Data analysis*

173 Populations, intervention, comparators, and outcomes (PICO) are described in Supplement S5.  
174 For the analysis of VE over time, the primary outcome measure was the VE and 95% confidence  
175 intervals (CIs) at each time interval after the final dose of the primary vaccine series. We extracted  
176 adjusted VE results for each outcome (infection, symptomatic disease, and severe disease) by  
177 vaccine, age group (all ages and older persons, as defined in each study though at least 50 years  
178 old) and variant setting. We only extracted VE estimates for time intervals when a person could  
179 have full vaccination, considered as having received the complete vaccine schedule followed by  
180 enough time to develop immunological protection, as defined in the clinical trials for each vaccine  
181 (i.e.,  $\geq 7$  days from the second dose for Pfizer/BioNTech-Comirnaty, and  $\geq 14$  days from the second  
182 dose for AstraZeneca-Vaxzevria and Moderna-mRNA-1273, and the first dose of Janssen-  
183 Ad26.COV2.S.) Because VE may be lower against some variants of concern (VOC) and the  
184 prevalence of VOCs in a study population could change over time<sup>4</sup>, we evaluated VE estimates  
185 for two variant settings separately. In the first, we evaluated VE estimates over time for a single  
186 VOC, either as determined by genomic sequencing or during a period when that variant was  
187 predominant, from settings with only non-VOC variants, and from settings with non-VOCs and  
188 Alpha variant because of minimal differences in VE.<sup>13</sup> In the second, we evaluated settings in  
189 which there was a mixture of variants over time, including some period with non-Alpha VOCs in  
190 circulation. To show visually the duration of VE over time, we plotted VE at the median time  
191 point for each time interval separately by outcome, age group, and variant context (Supplement  
192 S6 methods for figures.) The set of VE estimates over time for each unique study-vaccine grouping  
193 are shown joined by a line.

194 The average change in VE over time was estimated using a linear mixed effects model for the  
195 repeated measures within each study-vaccine group (PROC MIXED; SAS 9.4; Supplement S7  
196 detailed methods). We regressed the log of 1-VE on log of months since vaccination (to maintain  
197 a linear relationship between VE and time in months). Standard errors (SEs) of the  $\ln(1-VE)$ s,  
198 derived from the 95% CIs for the VEs reported by each study, were squared to produce estimates  
199 of residual variances for inverse weighting in the linear mixed effects model. The model had a  
200 random intercept and slope over time for each study-vaccine group (i.e., each line in figures). For  
201 VE estimates of 100% where 95% CIs were not estimable, we approximated the SEs using study  
202 data and adding 0.5 cases to each group. We excluded VE estimates with 95% CIs where the lower  
203 bound was  $\leq 0\%$  and upper bound was 100%, as these were uninformative. Models were run for  
204 each outcome, age group and variant context combination. Because we did not observe  
205 substantial differences in the results for single versus mixed variant settings, we also estimated  
206 the change in VE combining both variant settings to increase precision around summary  
207 estimates.

208 For the analysis of vaccine breakthrough Delta infections, we extracted data on study design,  
209 population size, testing period, vaccines in use, age group, outcome, cases and denominator for  
210 cohorts of persons grouped by time since final dose. We calculated incidence rates or risk from  
211 case and denominator data for each vaccinated cohort. Incidence rate/risk ratios (IRR) were  
212 calculated by dividing the incidence rate/risk of each vaccinated cohort by that of a reference  
213 group. The vaccinated cohort most recently vaccinated was used as the reference group. 95% CIs  
214 for IRRs were calculated from raw study data using the Byar method for rates and the Taylor  
215 series method for risks.<sup>14,15</sup> Studies presenting adjusted odds ratios of breakthrough infection

216 with 95% CIs were also included (n=3).<sup>16-18</sup> Incidence rate/risk/odds ratios with 95% CIs were  
217 graphed for each vaccinated cohort.

218 *Role of the funding source.* Coalition for Epidemic Preparedness Innovations (CEPI) supports the  
219 ongoing literature review and data abstraction. They had no role in the analysis or interpretation  
220 of results.

## 221 **Results.**

222 13,744 studies were screened, and 310 underwent full text review (Figure 1). After applying two  
223 sets of inclusion/exclusion criteria, 18 studies were included in the VE analysis. Seven were peer-  
224 reviewed publications, ten were not peer-reviewed (e.g., pre-prints, MMWR), and one came from  
225 a regulatory application. Three were randomized controlled trials<sup>19-21</sup> and fifteen post-  
226 introduction observational studies (7 test-negative design case-control studies, 6 retrospective  
227 and 2 prospective cohort studies, Table 1).<sup>10,22-35</sup> Studies were conducted in the following  
228 locations: Canada (1), Finland (1), Israel (1), Qatar (1), Spain (1), Sweden (1), United Kingdom (2),  
229 United States (8), and two multi-country clinical trials. (The Canadian study included separate  
230 results for Quebec and British Columbia, so results for each province were considered separately  
231 for this review.)<sup>31</sup> Among included studies, three had low overall risk of bias, eight moderate risk,  
232 and seven serious risk (Supplement S8). The major domain of bias was incomplete adjustment  
233 for confounders.

234 Ten studies evaluated the VE over time for SARS-CoV-2 infection, among which there were 26  
235 vaccine-specific analyses (Pfizer/BioNTech-Comirnaty (n=13), Moderna-mRNA-1273 (n=9),  
236 Janssen-Ad26.COVID.S (n=2), AstraZeneca-Vaxzevria (n=2) (Table 1).<sup>10,22,23,26,28,31,33-35</sup> Ten

237 vaccine-specific analyses took place in single variant settings (all Delta), and 16 in mixed variant  
238 settings. Eighteen vaccine-specific analyses included persons of all ages and eight among older  
239 persons. Among the 26 vaccine-specific analyses of VE for SARS-CoV-2 infection, the majority  
240 (22, 85%) showed a  $\geq 10$  percentage point drop from the peak VE and ten (38%) a  $\geq 25$   
241 percentage point drop (Table 2). Declines in VE against infection were observed in both variant  
242 settings, in both age groups, and among all four vaccines (Figure 2a and 2b). When combining  
243 all VE evaluations of SARS-CoV-2 infection, regardless of variant type, in the meta-regression  
244 the VE decreased on average by 21.0 (95% CI 13.9-29.8) and by 20.7 (95% CI 10.2–36.6)  
245 percentage points between 1 and 6 months after the final vaccine dose among persons of all  
246 ages and older persons, respectively.

247 Six studies evaluated the VE over time for symptomatic COVID-19 disease, among which there  
248 were 16 vaccine-specific analyses (Pfizer/BioNTech-Comirnaty (n=6), Moderna-mRNA-1273  
249 (n=4), Janssen-Ad26.COV2.S (n=3), AstraZeneca-Vaxzevria (n=3) (Table 1).<sup>19–21,25,29,30</sup> Five  
250 vaccine-specific analyses took place in single variant settings (four Delta, one non-VOCs), and 11  
251 in mixed variant settings. Eleven vaccine-specific analysis were done among persons of all ages  
252 and five among older persons. Among the 16 vaccine-specific analyses of VE for symptomatic  
253 disease, the majority (15, 94%) showed a  $\geq 10$  percentage point drop from the peak VE and  
254 eight (50%) a  $\geq 25$  percentage point drop, all of which were in mixed variant settings (Table 2).  
255 Declines in VE against symptomatic disease were observed in both variant settings, in both age  
256 groups, and among all four vaccines (Figure 2a and 2b). Of note, the one study that showed no  
257 decline in VE was the extended follow-up of the randomized controlled trial of the Moderna-  
258 mRNA-1273 vaccine during a period of non-VOC circulation in the United States.<sup>19</sup> When

259 combining all VE evaluations of symptomatic disease, regardless of variant type, in the meta-  
260 regression the VE decreased on average by 24.9 (95% CI 13.4-41.6) and by 32.0 (95% CI 11.0–  
261 69.0) percentage points between 1 and 6 months after the final vaccine dose among persons of  
262 all ages and older persons, respectively.

263 Twelve studies evaluated the VE over time for severe COVID-19 disease, among which there  
264 were 36 vaccine-specific analyses (Pfizer/BioNTech-Comirnaty (n=19), Moderna-mRNA-1273  
265 (n=10), Janssen-Ad26.COV2.S (n=4), AstraZeneca-Vaxzevria (n=3) (Table 1).<sup>10,21,22,24,25,27–29,31–34</sup>  
266 Thirteen vaccine-specific analyses took place in single variant settings (eleven Delta, two Alpha),  
267 and 23 in mixed variant settings. Twenty-two vaccine-specific analysis were done among  
268 persons of all ages and fourteen among older persons. Among the 36 vaccine-specific analyses  
269 of VE for severe disease, seventeen (47%) showed a  $\geq 10$  percentage point drop from the peak  
270 VE (Table 2). Four vaccine-specific analyses (11%) showed a  $\geq 25$  percentage point drop in VE;  
271 two from one study in Qatar for Pfizer/BioNTech-Comirnaty and the other two from a study in  
272 the United States for Janssen-Ad26.COV2.S.<sup>22,29</sup> In both studies, the  $\geq 25$  percentage point VE  
273 decrease was observed among both age categories in the setting of mixed variants, with very  
274 wide 95% confidence intervals for the lowest VE estimates. Seven (19%) vaccine-specific  
275 analyses (from five studies) had an absolute VE estimate against severe disease fall below 70%  
276 at a single time point in follow-up (Pfizer/BioNTech-Comirnaty n=3, Ad26.COV2.S  
277 n=4).<sup>21,22,27,32,33</sup> When combining all VE evaluations of severe disease, regardless of variant  
278 type, in the meta-regression the VE decreased on average by 10.0 (95% CI 6.1-15.4) and by 9.5  
279 (95% CI 5.7–14.6) percentage points between 1 and 6 months after the final vaccine dose  
280 among persons of all ages and older persons, respectively.

281 In the analysis of Delta breakthrough infections, seven studies were found through the search  
282 strategy and one through hand-searching regulatory applications; one study was excluded due  
283 to combining the results of several vaccines, leaving seven studies for final inclusion (Figure 1,  
284 Table 3). One study had low overall risk of bias, two moderate risk, and four serious risk  
285 (Supplement S8). In two clinical trials, persons initially randomized to study vaccine had an  
286 increased rate of breakthrough symptomatic COVID-19 disease during July-August 2021 when  
287 Delta variant predominated compared to those who initially received placebo and “crossed over”  
288 later to receive the actual COVID-19 vaccine; 1.76 (95% CI 1.13-2.76) times higher for  
289 Pfizer/BioNTech-Comirnaty and 1.57 (95% CI 1.21-2.04) higher for Moderna-mRNA-1273 (Figure  
290 3).<sup>36,37</sup> Four observational studies from Israel of Pfizer/BioNTech-Comirnaty measured incidence  
291 after June 2021 when Delta predominated.<sup>10,16–18</sup> All four studies found rates of breakthrough  
292 infections higher among at least one cohort of people vaccinated further back in time compared  
293 to more recently vaccinated persons, with increased rates of breakthrough infections ranging  
294 from 1.61 times (95% CI 1.45-1.79)<sup>16</sup> to 14.10 times (95% CI 10.68-19.01)<sup>17</sup>. A study from the  
295 United States found a higher rate of breakthrough infections among persons 65 years or older  
296 vaccinated further back in time for Pfizer/BioNTech-Comirnaty (IRR 1.62, 95% CI 1.51-1.73) and  
297 Moderna-mRNA-1273 vaccines (1.67, 95% CI 1.52-1.84). Two studies evaluated breakthrough  
298 severe infections; one in Israel had a maximum of 3.25 times (95% CI 1.73-6.09) increased rates  
299 of breakthrough severe infections among persons aged 60 years or older vaccinated with  
300 Pfizer/BioNTech-Comirnaty further back in time, and one in the United States had maximum of  
301 1.38 times (95% CI 1.18-1.62) increased rate of breakthrough hospitalized infections among



302 persons aged 65 years and older vaccinated with Pfizer/BioNTech-Comirnaty further back in  
303 time.<sup>38</sup>

#### 304 **Discussion**

305 We showed that the decline in VE against severe COVID-19 disease with time since vaccination  
306 was less than that for SARS-CoV-2 infection and symptomatic COVID-19 disease. In most studies,  
307 the VE against severe disease remained high ( $\geq 70\%$ ) for up to six months post-vaccination for all  
308 four vaccines evaluated (and mostly  $\geq 80\%$  for the two mRNA vaccines). Nonetheless, there was  
309 a drop in VE for severe disease by six months, of on average, 9.5-10.0 percentage points, including  
310 among older persons. This lesser decrease in VE for severe disease is reassuring given that  
311 prevention of severe disease and death remains the primary objective of COVID-19 vaccination.  
312 In contrast, most studies showed a notable decrease in VE by six months after vaccination for  
313 SARS-CoV-2 infection (21 percentage point decrease) and all symptomatic COVID-19 disease (25-  
314 32 percentage point decrease). The data was heterogenous, however, with some studies showing  
315 minimal decrease in VE over time, with others showing substantial decrease (i.e.,  $\geq 25$  percentage  
316 points).

317 A decrease in the VE over time has three potential explanations – it can reflect lower VE against  
318 a new variant, true waning immunity due to loss of vaccine-induced immunological protection,  
319 or bias. We showed that VE decreased over time when restricting analysis to a single variant. This  
320 finding was reinforced by our second analysis of breakthrough infections with the Delta variant  
321 that showed higher breakthrough rates with longer times since vaccination. Together these  
322 findings suggest that the decrease in VE over time was likely not due, for the most part, to the  
323 temporal increase in prevalence of Delta variant.

324 Waning VE is a plausible explanation for the decrease in VE against infection and disease. The  
325 finding is consistent with immunological data showing that over time levels of most vaccine-  
326 derived antibodies, including those that neutralize virus, decline.<sup>39,40</sup> Yet, because the immune  
327 system forms memory cells that can be activated upon exposure to a virus and includes cellular  
328 immunity, it is not clear if this observed antibody decay results in diminished VE and if so, over  
329 what timeframe and against which outcomes. Nevertheless, further support for possible waning  
330 immunity comes from evidence showing that after giving a booster dose the VE increases  
331 compared to persons who had only received the primary series.<sup>41,42</sup> Moreover, it has been shown  
332 that with increasing time since full vaccination, the viral load of breakthrough infections  
333 increases, but becomes lower again soon after booster vaccination.<sup>43</sup> We did not see an obvious  
334 difference in the magnitude or timing of decrease in VE between persons of all ages and older  
335 people in meta-regression, although the number of studies was likely too few to make definitive  
336 conclusions. A study from the United Kingdom showed that decreases in VE seemed to occur  
337 more among clinically extremely vulnerable older persons.<sup>25</sup>

338 While waning immunity is consistent with the data, we cannot exclude that the observed  
339 decrease in VE over time was due, either partly or wholly, to biases. An underlying assumption  
340 of observational studies is that unvaccinated persons should be at the same risk of exposure to  
341 SARS-CoV-2 as vaccinated persons in the same population. At high vaccine coverage, this  
342 assumption might no longer apply, as persons remaining unvaccinated either choose to remain  
343 unvaccinated or are unable to get vaccinated for reasons that might be associated with a  
344 differential risk of COVID-19 compared to the general population.<sup>30,44–46</sup> While some differences  
345 can be identified and adjusted for in the analysis (e.g., age, demographic group), others might be

346 less obvious, harder to measure and adjust for, and lead to underestimation of true VE over time  
347 (e.g., clinically extremely vulnerable status).<sup>25</sup> The expected bias based on the magnitude and  
348 direction of the differential risk of COVID-19 among unvaccinated persons demonstrates that  
349 confounding is more significant when the true VE is not as high (supplement S9); this implies that  
350 confounding by risk among the unvaccinated group is accentuated when the vaccine has lower  
351 initial efficacy and when the true VE has become lower over time.

352 Several other potential biases in assessing the duration of VE over time can occur (Table 4). Some  
353 important biases that could result in an overestimation of decreases in VE over time are the  
354 following: the earliest vaccinees are at sustained increased risk of infection compared to later  
355 vaccinees; vaccinated people change behavior and testing frequency over time increasing the  
356 likelihood of being infected or being detected as infected, particularly with increased mobility for  
357 those who can demonstrate vaccination status; and unvaccinated persons have increased  
358 infection-derived immunity leading to spurious interpretations of reductions in VE as waning  
359 protection.<sup>47</sup> Because most of these biases are unmeasured, we cannot definitely determine  
360 which ones most affected the studies included in this analysis.

361 Our systematic review had several other potential limitations. First, given the rapid pace and  
362 multiple pre-print publishing options for COVID-19-related content, it is possible that additional  
363 studies on vaccine duration of protection were not captured by our search strategy, and new  
364 studies will become available after our cut-off date. Second, many pre-print studies included in  
365 this analysis could have the data change in the eventual publication. Third, insufficient studies  
366 met our inclusion criteria to allow for meaningful comparisons between different vaccine  
367 platforms. Fourth, a limited number of vaccines were evaluated and from few geographic

368 settings, which might not be representative of other settings with different epidemiological  
369 conditions in which duration of vaccine protection might differ (e.g., more or less prior infection).  
370 Fifth, few studies evaluated VE separately in younger persons; the three studies that did so  
371 showed similar patterns of decrease in VE over time to that seen in adults of all ages and older  
372 persons (Supplement S10). Sixth, no heterologous schedules were evaluated. Seventh, all  
373 included studies were pre-Omicron. Lastly, we based our calculations on published or derived  
374 estimates of VE and their standard errors rather than original person-level event data. One  
375 manifestation of this limitation is the necessity to introduce small adjustments to VE estimates  
376 of 100% in order to include them in our model for the log-transformed relative risk estimates.  
377 The potential bias in the summary VE estimates is small because there were only three VE  
378 estimates of 100%, and two had wide confidence intervals which down-weights their  
379 contribution in the regression model.

380 Further follow-up of the VE against severe disease, the outcome which drives most COVID-19  
381 policy decisions, for all vaccines beyond six months is needed to clarify how much more waning  
382 of protection might occur with longer duration since full vaccination.<sup>48</sup> Continuing to produce  
383 reliable and vaccine-specific VE estimates over extended periods of time after vaccination against  
384 multiple outcomes, and in the setting of emerging variants against which VE might be lower, such  
385 as Omicron, is critical for COVID-19 vaccine policy and decision-making bodies.<sup>49</sup> Policy makers  
386 considering the use and timing of booster doses should integrate vaccine- and outcome-specific  
387 evidence of decreasing VE with other considerations, such as vaccine coverage and supply,  
388 prioritization relative to primary series vaccination, programmatic issues, and local COVID-19  
389 epidemiology.

390

391

392

393 **Contributors.**

394 Conceptualization -- DF, MH, MDK, MP

395 Data curation -- MH

396 Data access -- LAR, NA, YG, AH have published data that contributed to this analysis. All data included is  
397 in the public domain.

398 Literature search and data collection - MH, MP

399 Formal analysis – MDK

400 Funding acquisition -- Not applicable

401 Methodology -- MDK, SZ

402 Project administration -- MH

403 Resources -- Not applicable

404 Supervision -- DF

405 Visualization-- DF, MH, MDK, MP

406 Writing original draft-- DF

407 Data Interpretation, Writing Review and Editing—All authors

408 **Declaration of interest.**

409 MMH reports research grants from World Health Organization (WHO, Coalition for Epidemic  
410 Preparedness Innovations (CEPI), Asian Development Bank (ADB), Bill & Melinda Gates Foundation  
411 (BMGF), and Pfizer (all paid to the institution). RA reports a contract from the United States Centers for

412 Disease Control and Prevention, a grant from the Chile Ministry of Science, and consulting fees from Mayo  
413 Clinic and Chile Ministry of Health. YG reports research grants from the United States-Israel Binational  
414 Science Foundation (BSF) and Israel Science Foundation. MJG reports research grants from South African  
415 Medical Research Council and BMGF (all paid to the institution) and participation on a data safety  
416 monitoring board for a study on the effectiveness of COVID-19 vaccination against SARS-CoV-2-associated  
417 hospitalization and death. AH reports research grants from United States-Israel BSF. KLO serves as the  
418 Secretariat for the WHO Strategic Advisory Group of Experts on Immunization. MDK reports research  
419 grants from WHO, CEPI, ADB, and Pfizer (all paid to the institution) and consultancy fees from Merck.

#### 420 **Data sharing**

421 All data included were derived from publicly available documents cited in the references.  
422 Extracted data are available upon request to the corresponding author.

#### 423 **Acknowledgments**

424 We want to acknowledge the important contribution of the following individuals in being able to  
425 undertake this analysis: Anurima Baidya, Karoline Walter, Siqi Li, Hanane Issa, Parisa  
426 ShamaeiZadeh, and Marely Jurgensmeyer. We thank Dr. Dan-Yu Lin from University of North  
427 Carolina, Chapel Hill, USA for providing exact VE estimates and confidence intervals for his study.

428

429

430

431

432 **References.**

- 433 1 World Health Organization. Guidance document: Status of COVID-19 Vaccines within WHO EUL/PQ  
434 evaluation process. 2021  
435 [https://extranet.who.int/pqweb/sites/default/files/documents/Status\\_COVID\\_VAX\\_15July2021.pdf](https://extranet.who.int/pqweb/sites/default/files/documents/Status_COVID_VAX_15July2021.pdf).
- 436 2 World Health Organization. COVID-19 weekly epidemiological update, edition 50, 27 July 2021. World  
437 Health Organization, 2021 <https://apps.who.int/iris/handle/10665/343387> (accessed Nov 7, 2021).
- 438 3 Harder T, Koch J, Vygen-Bonnet S, *et al.* Efficacy and effectiveness of COVID-19 vaccines against  
439 SARS-CoV-2 infection: interim results of a living systematic review, 1 January to 14 May 2021.  
440 *Eurosurveillance* 2021; **26**: 2100563.
- 441 4 Harder T, Külper-Schiek W, Reda S, *et al.* Effectiveness of COVID-19 vaccines against SARS-CoV-2  
442 infection with the Delta (B.1.617.2) variant: second interim results of a living systematic review and  
443 meta-analysis, 1 January to 25 August 2021. *Eurosurveillance* 2021; **26**: 2100920.
- 444 5 Higdon MM, Wahl B, Jones CB, *et al.* A systematic review of COVID-19 vaccine efficacy and  
445 effectiveness against SARS-CoV-2 infection and disease. *medRxiv*. 2021; (published online September  
446 25.) (preprint). <https://doi.org/10.1101/2021.09.17.21263549>
- 447 6 Kow CS, Hasan SS. Real-world effectiveness of BNT162b2 mRNA vaccine: a meta-analysis of large  
448 observational studies. *Inflammopharmacol* 2021; **29**: 1075–90.
- 449 7 Meggiolaro A, Schepisi MS, Nikolaidis G, Mipatrini D, Siddu A, Rezza G. Effectiveness of vaccination  
450 against symptomatic and asymptomatic SARS-CoV-2 infection: a systematic review and meta-analysis.  
451 *medRxiv*. 2021; (published online August 28.). (preprint). <https://doi.org/10.1101/2021.08.25.21262529>
- 452 8 Zeng B, Gao L, Zhou Q, Yu K, Sun F. Effectiveness of COVID-19 vaccines against SARS-CoV-2 variants of  
453 concern: a systematic review and meta-analysis. 2021. *medRxiv*. 2021; (published online September 26.)  
454 (preprint). <https://doi.org/10.1101/2021.09.23.21264048>
- 455 9 International Vaccine Access Center. Results of COVID-19 Vaccine Effectiveness & Impact Studies: An  
456 Ongoing Systematic Review, Methods. VIEW-hub. 2021; published online July 22. <https://view-hub.org>  
457 (accessed Dec 8, 2021).
- 458 10 Goldberg Y, Mandel M, Bar-On YM, *et al.* Waning Immunity after the BNT162b2 Vaccine in Israel.  
459 *New England Journal of Medicine* 2021; **0**: null.
- 460 11 Sterne JA, Hernán MA, Reeves BC, *et al.* ROBINS-I: a tool for assessing risk of bias in non-randomised  
461 studies of interventions. *BMJ* 2016; **355**: i4919.
- 462 12 Sterne JAC, Savović J, Page MJ, *et al.* RoB 2: a revised tool for assessing risk of bias in randomised  
463 trials. *BMJ* 2019; **366**: l4898.
- 464 13 Weekly epidemiological update on COVID-19 - 2 November 2021.  
465 [https://www.who.int/publications/m/item/weekly-epidemiological-update-on-covid-19---2-november-](https://www.who.int/publications/m/item/weekly-epidemiological-update-on-covid-19---2-november-2021)  
466 2021 (accessed Nov 7, 2021).



467 14 Breslow NE, Day NE. Statistical methods in cancer research. Volume II--The design and analysis of  
468 cohort studies. *IARC Sci Publ* 1987.

469 15 Kleinbaum DG, Kupper LL, Morgenstern H. Epidemiologic Research: Principles and Quantitative  
470 Methods. John Wiley & Sons, 1991.

471 16 Kertes J, Gez SB, Saciuk Y, *et al.* Effectiveness of the mRNA BNT162b2 vaccine six months after  
472 vaccination: findings from a large Israeli HMO. *medRxiv*. 2021; (published online September 7.)  
473 (preprint). <https://doi.org/10.1101/2021.09.01.21262957>.

474 17 Israel A, Merzon E, Schäffer AA, *et al.* Elapsed time since BNT162b2 vaccine and risk of SARS-CoV-2  
475 infection: test negative design study. *BMJ* 2021; **375**: e067873.

476 18 Mizrahi B, Lotan R, Kalkstein N, *et al.* Correlation of SARS-CoV-2 Breakthrough Infections to Time-  
477 from-vaccine; Preliminary Study. *medRxiv* 2021; (published online July 31.) (preprint).  
478 <https://doi.org/10.1101/2021.07.29.21261317>.

479 19 El Sahly HM, Baden LR, Essink B, *et al.* Efficacy of the mRNA-1273 SARS-CoV-2 Vaccine at Completion  
480 of Blinded Phase. *New England Journal of Medicine* 2021; **385**: 1774–85.

481 20 Thomas SJ, Moreira ED, Kitchin N, *et al.* Six Month Safety and Efficacy of the BNT162b2 mRNA COVID-  
482 19 Vaccine. *medRxiv* 2021; (published online July 28): <https://doi.org/10.1101/2021.07.28.21261159>.

483 21 Janssen. Vaccines and Related Biological Products Advisory Committee October 14-15, 2021 Meeting  
484 Briefing Document - FDA (Janssen) | FDA. 2021; published online Oct 15.  
485 <https://www.fda.gov/media/153037/download> (accessed Nov 7, 2021).

486 22 Chemaitelly H, Tang P, Hasan MR, *et al.* Waning of BNT162b2 Vaccine Protection against SARS-CoV-2  
487 Infection in Qatar. *New England Journal of Medicine* 2021; **0**: null.

488 23 Martínez-Baz I, Trobajo-Sanmartín C, Miqueleiz A, *et al.* Product-specific COVID-19 vaccine  
489 effectiveness against secondary infection in close contacts, Navarre, Spain, April to August 2021.  
490 *Eurosurveillance* 2021; **26**: 2100894.

491 24 Thompson MG, Stenehjem E, Grannis S, *et al.* Effectiveness of Covid-19 Vaccines in Ambulatory and  
492 Inpatient Care Settings. *New England Journal of Medicine* 2021; **385**: 1355–71.

493 25 Andrews N, Tessier E, Stowe J, *et al.* Vaccine effectiveness and duration of protection of Comirnaty,  
494 Vaxzevria and Spikevax against mild and severe COVID-19 in the UK. *medRxiv* 2021; (published online  
495 October 6.) (preprint). <https://doi.org/10.1101/2021.09.15.21263583>.

496 26 Bruxvoort KJ, Sy LS, Qian L, *et al.* Effectiveness of mRNA-1273 against Delta, Mu, and other emerging  
497 variants. *medRxiv* 2021; (published online October 1.) (preprint).  
498 <https://doi.org/10.1101/2021.09.29.21264199>.

499 27 Self WH. Comparative Effectiveness of Moderna, Pfizer-BioNTech, and Janssen (Johnson & Johnson)  
500 Vaccines in Preventing COVID-19 Hospitalizations Among Adults Without Immunocompromising  
501 Conditions — United States, March–August 2021. *MMWR Morb Mortal Wkly Rep* 2021; **70**.  
502 DOI:10.15585/mmwr.mm7038e1.

503 28 Tartof SY, Slezak JM, Fischer H, *et al.* Effectiveness of mRNA BNT162b2 COVID-19 vaccine up to 6  
504 months in a large integrated health system in the USA: a retrospective cohort study. *The Lancet* 2021;  
505 **398**: 1407–16.

506 29 Lin D-Y, Gu Y, Wheeler B, *et al.* Effectiveness of Covid-19 Vaccines in the United States Over 9  
507 Months: Surveillance Data from the State of North Carolina. *medRxiv* 2021; (published online October  
508 26.) (preprint). <https://doi.org/10.1101/2021.10.25.21265304>.

509 30 Nordström P, Ballin M, Nordström A. Effectiveness of Covid-19 Vaccination Against Risk of  
510 Symptomatic Infection, Hospitalization, and Death Up to 9 Months: A Swedish Total-Population Cohort  
511 Study. *SSRN* 2021; (published online October 25.) (preprint). <http://dx.doi.org/10.2139/ssrn.3949410>.

512 31 Skowronski DM, Setayeshgar S, Febriani Y, *et al.* Two-dose SARS-CoV-2 vaccine effectiveness with  
513 mixed schedules and extended dosing intervals: test-negative design studies from British Columbia and  
514 Quebec, Canada. *medRxiv* 2021; (published online October 26.) (preprint).  
515 <https://doi.org/10.1101/2021.10.26.21265397>.

516 32 Tenforde MW. Sustained Effectiveness of Pfizer-BioNTech and Moderna Vaccines Against COVID-19  
517 Associated Hospitalizations Among Adults — United States, March–July 2021. *MMWR Morb Mortal*  
518 *Wkly Rep* 2021; **70**. DOI:10.15585/mmwr.mm7034e2.

519 33 Irizarry RA, Robles-Fontán MM, Nieves EG, Cardona-Gerena I. Time-Varying Effectiveness of Three  
520 COVID-19 Vaccines in Puerto Rico. *SSRN* 2021; (published online October 25.) (preprint).  
521 <http://dx.doi.org/10.2139/ssrn.3957118>.

522 34 Poukka E, Baum U, Palmu AA, *et al.* Cohort study of Covid-19 vaccine effectiveness among healthcare  
523 workers in Finland, December 2020 - October 2021. *medRxiv* 2021; (published online November 8.)  
524 (preprint). <https://doi.org/10.1101/2021.11.03.21265791>.

525 35 Hall V, Foulkes S, Insalata F, *et al.* Effectiveness and durability of protection against future SARS-CoV-  
526 2 infection conferred by COVID-19 vaccination and previous infection; findings from the UK SIREN  
527 prospective cohort study of healthcare workers March 2020 to September 2021. *medRxiv* 2021;  
528 (published online December 1.) (preprint). <https://doi.org/10.1101/2021.11.29.21267006>.

529 36 Baden LR, Sahly HME, Essink B, *et al.* Covid-19 in the Phase 3 Trial of mRNA-1273 During the Delta-  
530 variant Surge. *medRxiv* 2021; (published online September 22.) (preprint).  
531 <https://doi.org/10.1101/2021.09.17.21263624>.

532 37 Pfizer Inc. BNT162b2 [Comirnaty (COVID-19 Vaccine, mRNA)] Evaluation of a Booster Dose (Third  
533 Dose) Vaccines and Related Biological Products Advisory Committee Briefing Document. Food and Drug  
534 Administration, 2021 <https://www.fda.gov/media/152161/download> (accessed Nov 7, 2021).

535 38 Rosenberg ES, Dorabawila V, Easton D, *et al.* Covid-19 Vaccine Effectiveness in New York State. *New*  
536 *England Journal of Medicine* 2021; **0**: null.

537 39 Dolgin E. COVID vaccine immunity is waning — how much does that matter? *Nature* 2021; **597**: 606–  
538 7.

539 40 Hamady A, Lee J, Loboda ZA. Waning antibody responses in COVID-19: what can we learn from the  
540 analysis of other coronaviruses? *Infection* 2021; published online July 29.  
541 <https://doi.org.10.1007/s15010-021-01664-z>.

542 41 Bar-On YM, Goldberg Y, Mandel M, *et al.* Protection of BNT162b2 Vaccine Booster against Covid-19  
543 in Israel. *New England Journal of Medicine* 2021; **385**: 1393–400.

544 42 Barda N, Dagan N, Cohen C, *et al.* Effectiveness of a third dose of the BNT162b2 mRNA COVID-19  
545 vaccine for preventing severe outcomes in Israel: an observational study. *The Lancet* 2021; **398**: 2093-  
546 100. [https://doi.org/10.1016/S0140-6736\(21\)02249-2](https://doi.org/10.1016/S0140-6736(21)02249-2).

547 43 Levine-Tiefenbrun M, Yelin I, Alapi H, *et al.* Viral loads of Delta-variant SARS-CoV-2 breakthrough  
548 infections after vaccination and booster with BNT162b2. *Nat Med* 2021.  
549 <https://doi.org/10.1038/s41591-021-01575-4>.

550 44 Nunes B, Rodrigues AP, Kislaya I, *et al.* mRNA vaccine effectiveness against COVID-19-related  
551 hospitalisations and deaths in older adults: a cohort study based on data linkage of national health  
552 registries in Portugal, February to August 2021. *Eurosurveillance* 2021; **26**: 2100833.

553 45 Jara A, Undurraga EA, González C, *et al.* Effectiveness of an Inactivated SARS-CoV-2 Vaccine in Chile.  
554 *New England Journal of Medicine* 2021; **385**: 875–84.

555 46 Thompson MG, Burgess JL, Naleway AL, *et al.* Prevention and Attenuation of Covid-19 with the  
556 BNT162b2 and mRNA-1273 Vaccines. *New England Journal of Medicine* 2021; **385**: 320–9.

557 47 Kahn R, Schrag S, Verani J, Lipsitch M. Identifying and alleviating bias due to differential depletion of  
558 susceptible people in post-marketing evaluations of COVID-19 vaccine. *medRxiv* 2021; (published online  
559 July 19.) (preprint). <https://doi.org/10.1101/2021.07.15.21260595>.

560 48 Khoury DS, Cromer D, Reynaldi A, *et al.* Neutralizing antibody levels are highly predictive of immune  
561 protection from symptomatic SARS-CoV-2 infection. *Nat Med* 2021; **27**: 1205–11.

562 49 Strategic Group of Experts on Immunization. Interim statement on booster doses for COVID-19  
563 vaccination. 2021; published online Oct 4. [https://www.who.int/news/item/04-10-2021-interim-](https://www.who.int/news/item/04-10-2021-interim-statement-on-booster-doses-for-covid-19-vaccination)  
564 [statement-on-booster-doses-for-covid-19-vaccination](https://www.who.int/news/item/04-10-2021-interim-statement-on-booster-doses-for-covid-19-vaccination) (accessed Nov 7, 2021).

565

566 **Figure legends.**

567 Figure 1. Study selection

568 Figure 2. Duration of Vaccine Effectiveness for (a) Single Variant or non-VOC settings or ((b)  
569 Mixed Variant settings

570 Footnote: The lower bound of 95% confidence intervals when VE=100% were undefined in  
571 manuscripts (n=1 in panel a and n=2 in panel b), and are shown here approximated (see  
572 methods in Supplementary materials S7)

573 Figure 3. Rate ratios of COVID-19 Breakthrough cases by time of vaccination
